# Supplementary material for: Development of a Singleplex Real-Time Reverse Transcriptase PCR Assay for Pan-Dengue Virus Detection and Quantification
Source: MDPI journal article supplement (doi:10.3390/v14061271), 2022-06-10
Supplement: s1 [file s1]

---

**Supplementary Materials for**  
**Development of Singleplex Real-Time Reverse Transcriptase PCR Assay for**  
**Pan-Dengue Virus Detection and Quantification**

Adisak Songjaeng, Somchai Thiemmecca, Dumrong Mairiang, Nuntaya Punyadee, Kessiri  
Kongmanas, Prachya Hansuealueang, Nattaya Tangthawornchaikul, Thaneeya Duangchinda,  
Juthathip Mongkolsapaya, Kanokwan Sriruksa, Wannee Limpitikul, Prida Malasit, and  
Panisadee Avirutnan

Correspondence to: panisadee.avi@mahidol.edu

**This PDF file includes:**

Figures. S1

Table S1

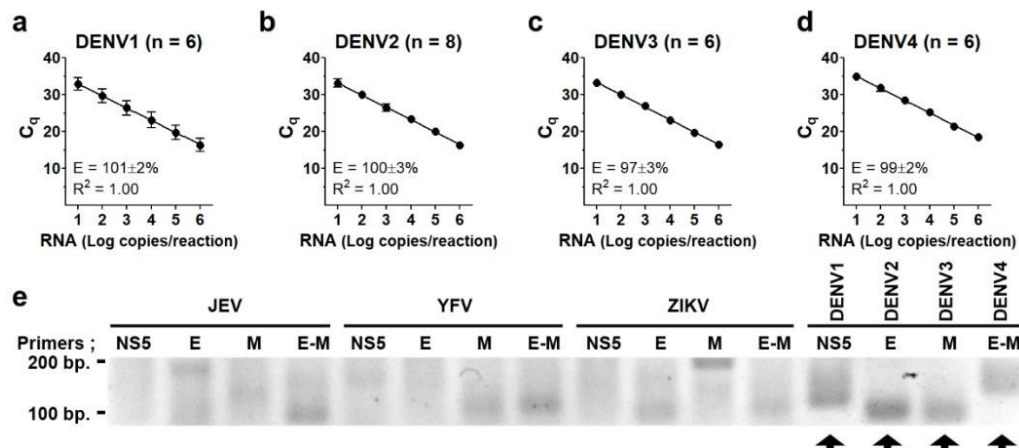

**Figure S1. Performance of coding region primers/probes.** Quantification cycle (C<sub>q</sub>) was determined using serial 10-fold diluted (10<sup>1</sup> to 10<sup>6</sup> RNA copies) in vitro transcribed DENV1-4 RNA as template. Coefficient of determination (R<sup>2</sup>) and PCR amplification efficiency (E) in DENV1 (a), DENV2 (b), DENV3 (c), and DENV4 (d) were analyzed from 6 to 8 independent experiments. RNA extracted from supernatants in **Figure 1f** were used as RNA templates for coding regions primers/probes. The sizes of PCR products (black arrow) for DENV1, DENV2, DENV3, and DENV4 were 112, 78, 74, and 89 base pairs, respectively. The PCR products were run in 2% agarose gel electrophoresis and were stained with red gel before visualization under UV light (e).

**Table S1.** Serotype specificities of coding regions primers/probes.

| <b>Viruses<br/>(Strain)</b> | <b>NS5 primer/probe<br/>(Mean±SD of Ct)</b> | <b>E primer/probe<br/>(Mean±SD of<br/>Ct)</b> | <b>M primer/probe<br/>(Mean±SD of Ct)</b> | <b>E-M primer/probe<br/>(Mean±SD of Ct)</b> |
|-----------------------------|---------------------------------------------|-----------------------------------------------|-------------------------------------------|---------------------------------------------|
| DENV1<br>(Hawaii)           | 10.94±0.04                                  | UD                                            | UD                                        | UD                                          |
| DENV2 (16681)               | UD                                          | 13.98±0.01                                    | UD                                        | UD                                          |
| DENV3 (H87)                 | UD                                          | UD                                            | 12.17±0.05                                | UD                                          |
| DENV4 (H241)                | UD                                          | UD                                            | UD                                        | 14.19±0.11                                  |
| YFV (17D)                   | UD                                          | UD                                            | UD                                        | UD                                          |
| JEV (Nakayama)              | UD                                          | UD                                            | UD                                        | UD                                          |
| ZIKV (ZV0127)               | UD                                          | UD                                            | UD                                        | UD                                          |

Mean and standard deviation (SD) are calculated from triplicate data.

UD represents under detection threshold (38 Ct).
